# Supplementary material for: Selection and characterization of a peptide-based complement modulator targeting C1 of the innate immune system
Source: Royal Society of Chemistry journal article supplement (doi:10.1039/d4cb00081a), 2024-01-01
Supplement: d4cb00081a1.pdf [file d4cb00081a1.pdf]

Hamers *et al.*

**SI**

**Selection and characterization of a peptide-based complement modulator targeting C1 of the innate immune system**

Sebastiaan M.W.R. Hamers<sup>1</sup>, Leoni Abendstein<sup>1</sup>, Aimee L. Boyle<sup>2,3</sup>, Seino A.K. Jongkees<sup>4</sup> & Thomas H. Sharp<sup>1,5,\*</sup>

<sup>1</sup>Department of Cell and Chemical Biology, Leiden University Medical Centre, 2300 RC Leiden, The Netherlands

<sup>2</sup>Leiden Institute of Chemistry, Leiden University, 2333 CC Leiden, The Netherlands

<sup>3</sup>School of Chemistry, University of Bristol, Bristol, BS8 1QU, UK

<sup>4</sup>Department of Chemistry and Pharmaceutical Sciences, Vrije Universiteit Amsterdam, Amsterdam, The Netherlands

<sup>5</sup>School of Biochemistry, University of Bristol, Bristol, BS8 1TD, UK

\*To whom correspondence should be addressed: [t.sharp@bristol.ac.uk](mailto:t.sharp@bristol.ac.uk)

**Keywords:**

Complement, RaPID, peptide selection, agonistic therapeutic, structure-guided drug design

## SI methods:

### QC of the peptides

#### Analytical HPLC

cL3-Az, cL3-Bt, cL3-inv and cL3-lin were analyzed on a Shimadzu Prominence-I LC2030 system equipped with a Dr Maish ReproSil Gold 120 C18 column (4.6 \* 250 mm, 5 µm). Samples were run at 30 °C and UV detection was performed at 214 nm. These flow systems were used: buffer A 95/5 vol% water (ultrapure)/ACN with 0.1% TFA and buffer B 5/95 water/ACN 0.1% TFA. The gradient was set at 0% buffer B for 2 min, then B concentration was ramped to 100% over the course of 25 min and kept there for 2 min. Buffer B concentration was then returned to 0 over the course of a minute and set at 0 for 3 more min. cL3 deletion variants were collected by Genscript. The solvent system was; Solvent A 0.065% TFA in water and solvent B 0.05% TFA in 100% ACN. Generally these were progressed from either a 5 vol% B to 65 or 35 in 25 min and then to 95% solvent B for 5 more min before going back to 5 vol% for 5 min. An Inertsil ODS-SP 4.6 x 250 mm column was used.

#### HRMS analysis

HRPMS analysis of the peptides was performed using a Shimadzu Nexera X2 UHPLC system equipped with a Waters Acquity HSS C18 column (2.1\*100mm, 1.8 µm) and a diode array detector. Samples were measured at 30 °C using the following solvent system: Solvent A, 0.1% formic acid in water; solvent B 0.1% formic acid in acetonitrile. Flow rate was set at 0.5 mL/min. Gradient started at 95:5 A:B for one minute, the ramping to 15:85 for 6 minutes and 0.:100 over the course of a minute and kept there for 3 minutes. Mass detection was performed in a Shimadzu 9030 QTOF mass spectrometer that had been calibrated with Agilent's API-TOF reference mass solution kit (5.0 mM purine, 100 mM ammonium trifluoroacetate and 2.5 mM hexakis (1H, 1H, 3H – tetrefluoropropoxy)-phosphazine). These were diluted to obtain a mass count of 10,000. Theoretical masses were calculated using Chemdraw 22.2.0 32-bit.

**Figures S7-20:** Analytical HPLC analysis of the peptides

HRMS data can be found tabulated in **Table S3** and sequences of the peptides in **Table S2**.

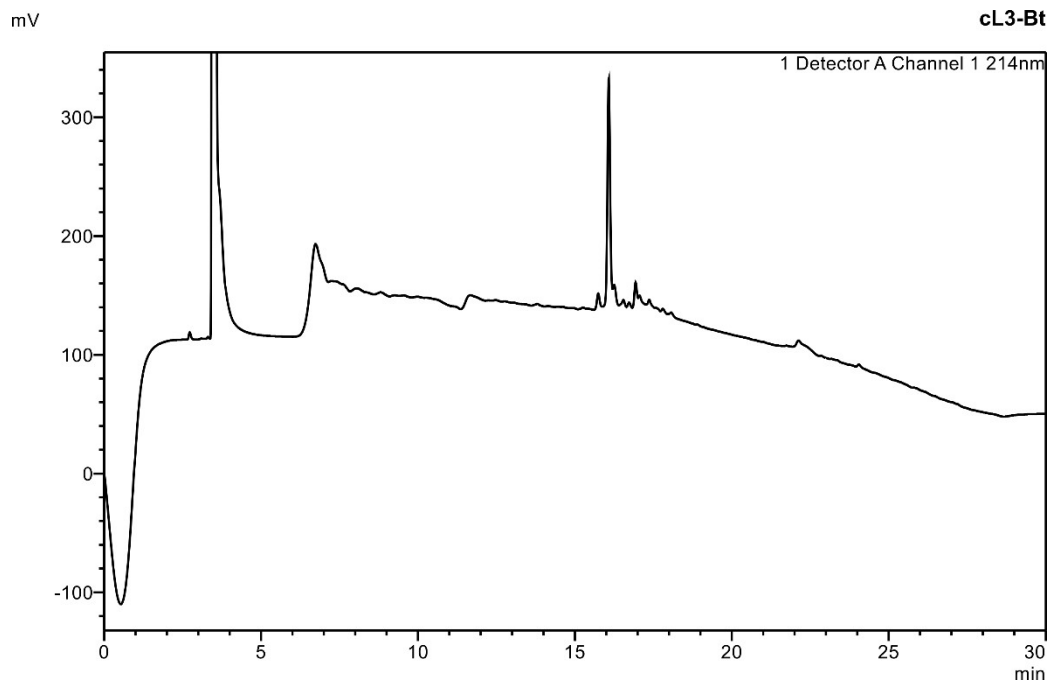

Figure S1

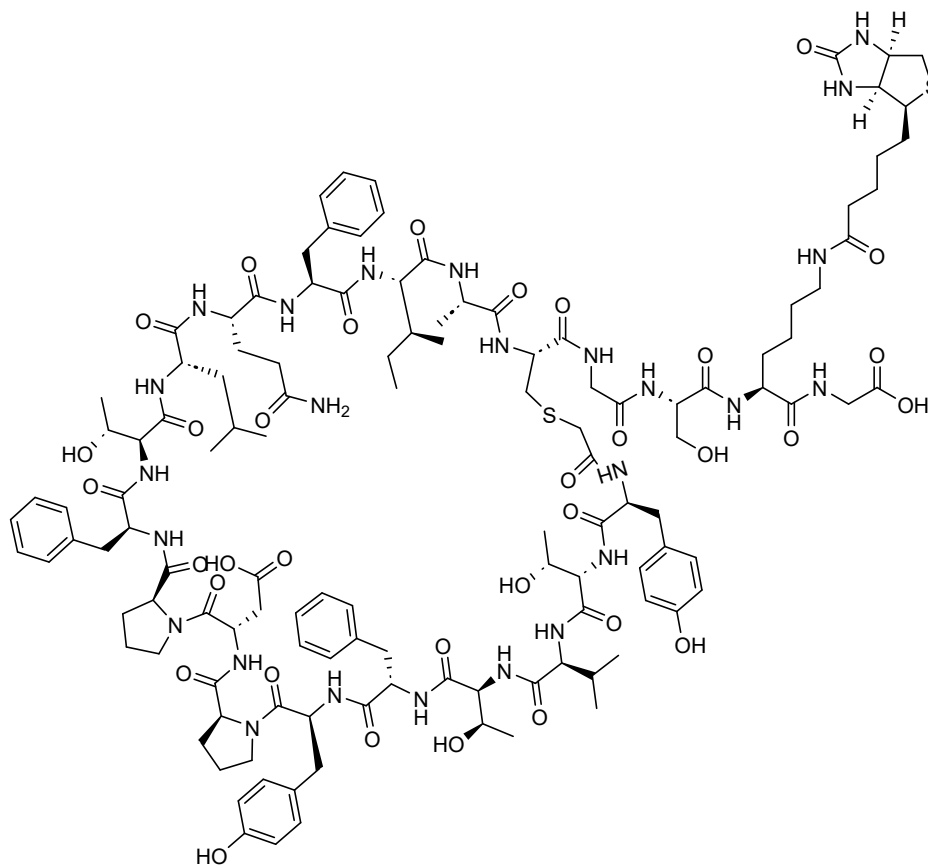

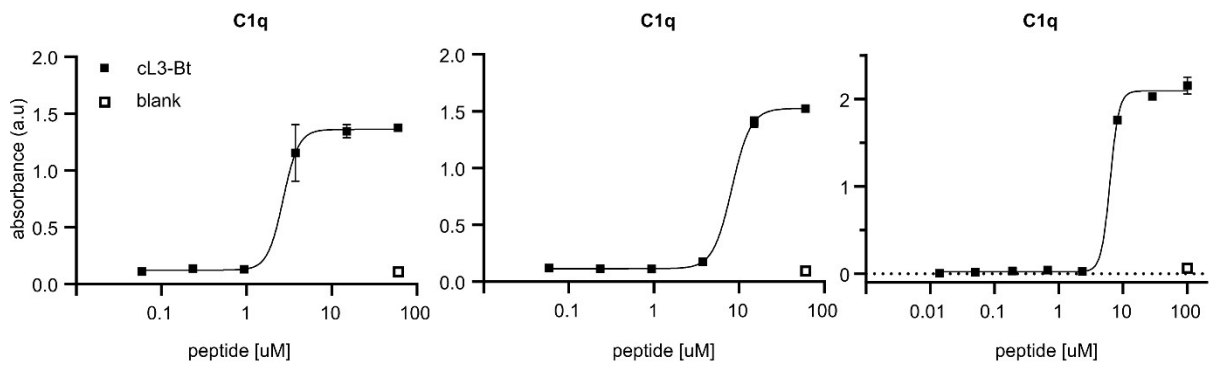

**Figure S2:** ELISA detecting C1q recruitment from human serum (1% in RPMI medium) using cL3-Bt. cL3-Bt was titrated and allowed to bind streptavidin coated plates, hereafter samples were washed to remove any unbound cL3-Bt and subsequently human serum was incubated on the plate. Each graph displays a technical duplicate collected on a different plate. cL3-Bt concentrations were slightly varied between plates. The datapoints on the right are also shown in **fig 3a**. Datapoints are shown in black squares and the line represents the fitted model. Graphpad Prism version 9.3.1 was used for model fitting using a non-linear dose vs response curve with four parameters least squares fit. Graph on the left: EC50: 2.68, CI confidence interval (%)EC50: not determined (ND),  $R^2$ : 0.98. Graph in the middle: EC50:8.2, CI confidence interval (%)EC50: 7.4-9.1,  $R^2$ : 0.99. Graph on the right: EC50: 6.2, CI confidence interval (%)EC50: ND,  $R^2$ : 0.99. Hence the EC50 as reported in the manuscript of  $\sim 6 \mu\text{M}$



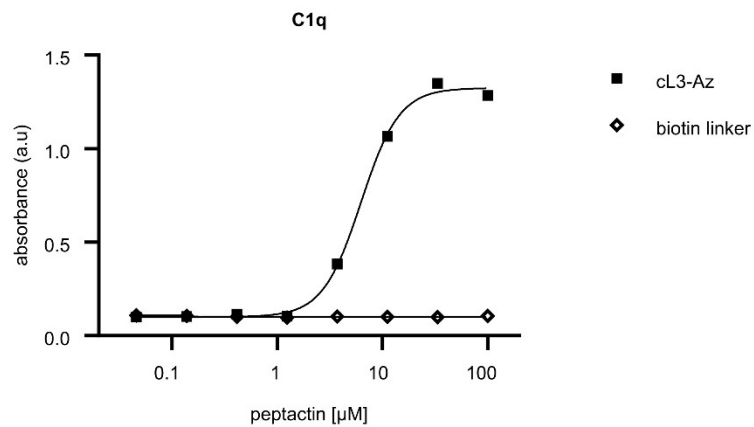

**Figure S4:** ELISA of cL3-Az conjugated to a biotin-DCBO linker. Linker and cL3-Az were co-incubated on a streptavidin coated plate for 1 hour at 37 °C allowing for conjugation to take place. Hereafter unbound linker and peptide were washed off and human serum (1%, in RPMI medium) was added and subsequently C1q was detected. A single technical replicate is shown here. Datapoints are displayed in the black squares and the fitted model is the black line. Graphpad Prism version 9.3.1 was used for model fitting using a non-linear dose vs response curve with four parameters least squares fit. EC50:6.2, CI confidence interval (%) EC50: 5.2-7.4 ,  $R^2$ : 0.99.

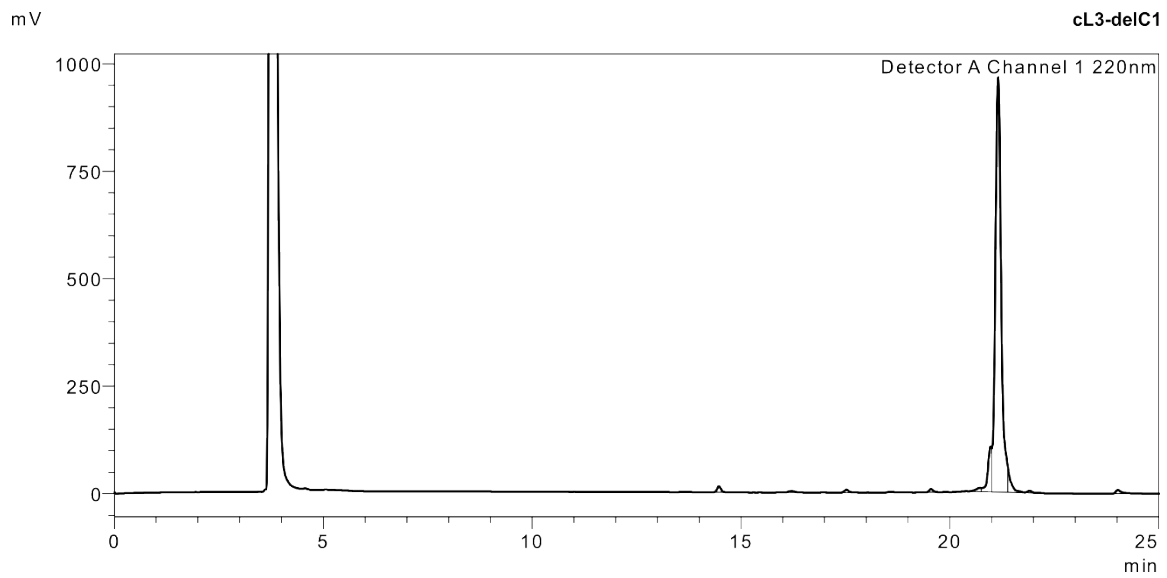

Figure S5

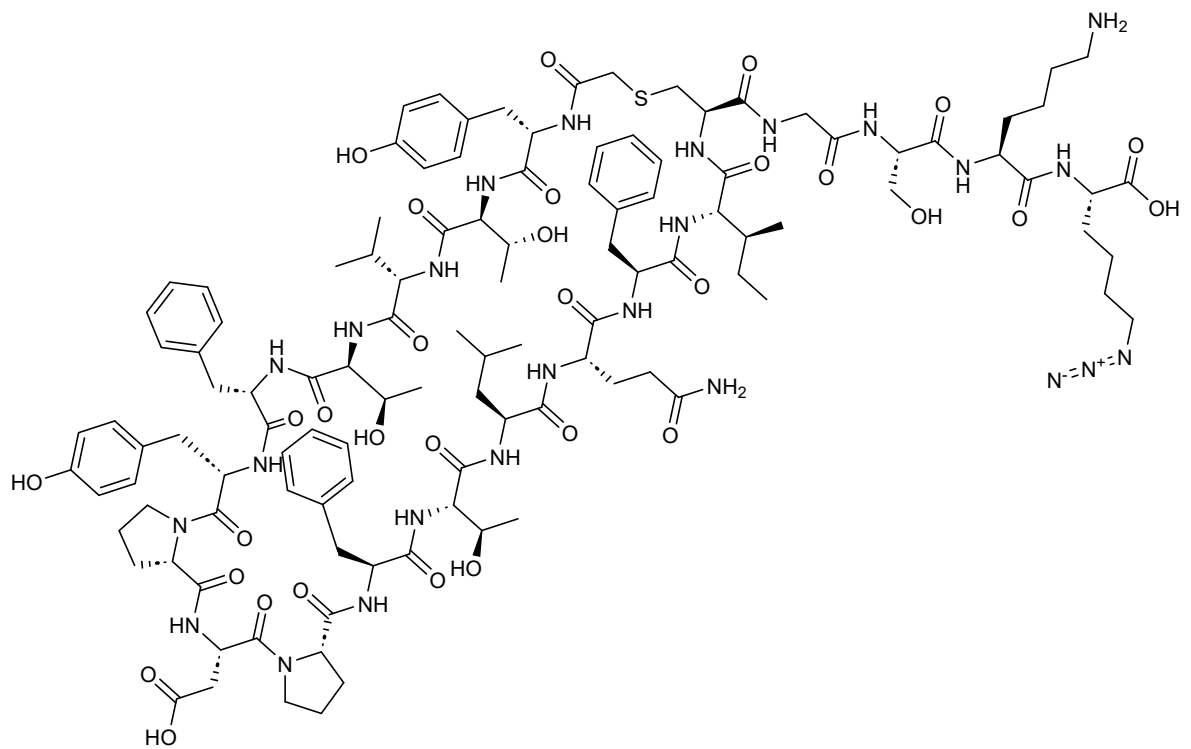

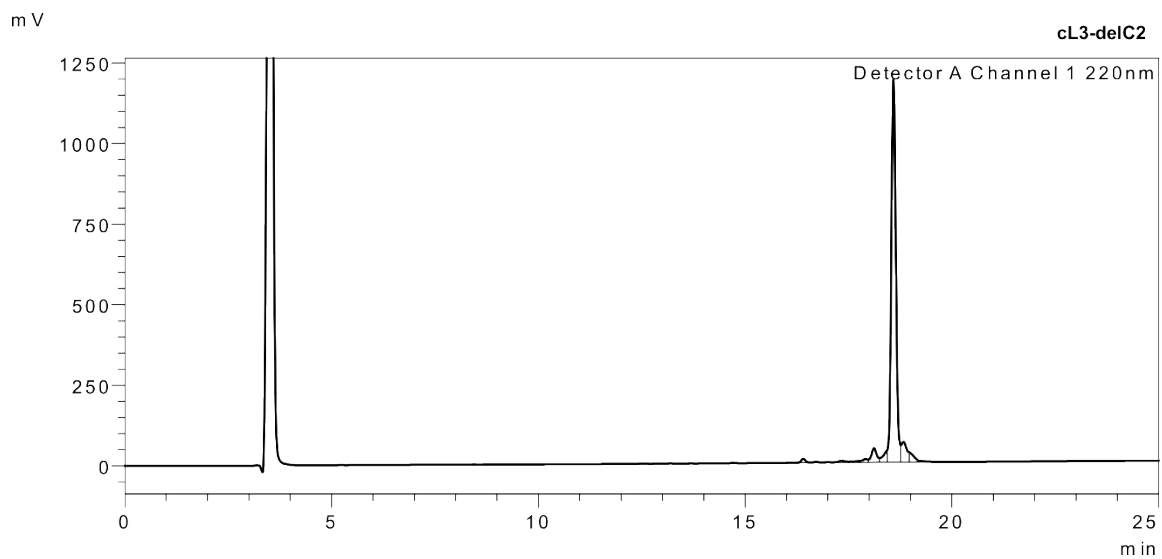

Figure S6

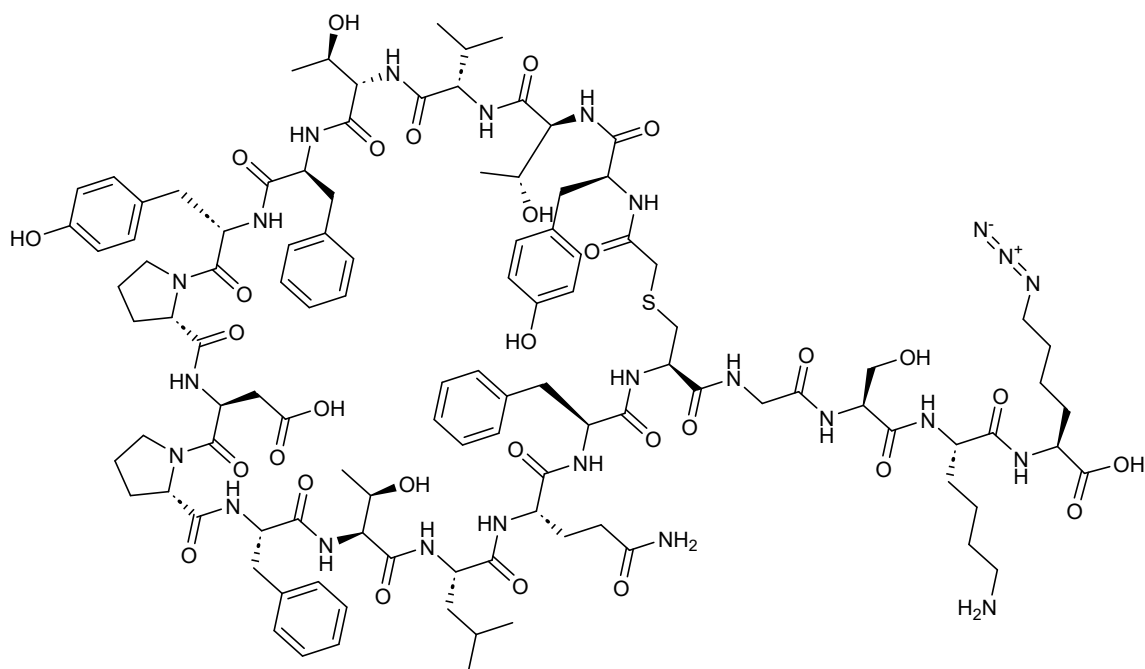



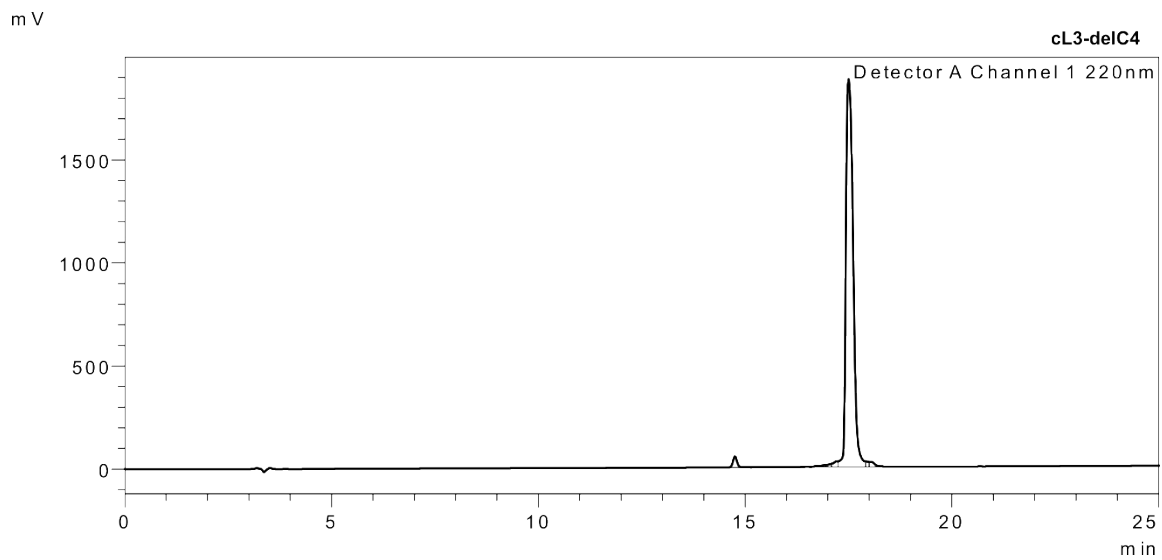

Figure S7

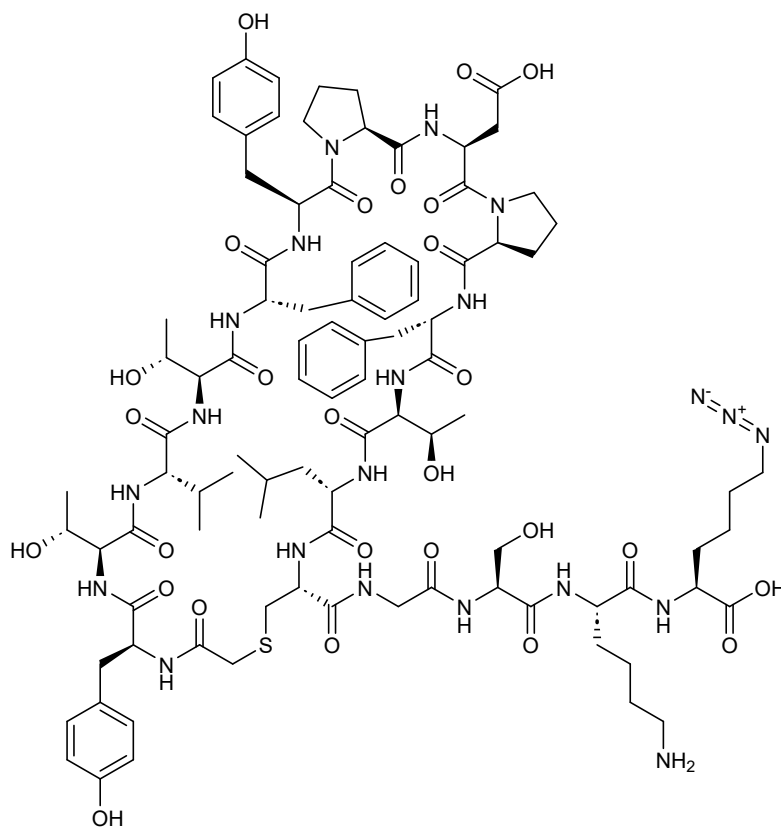





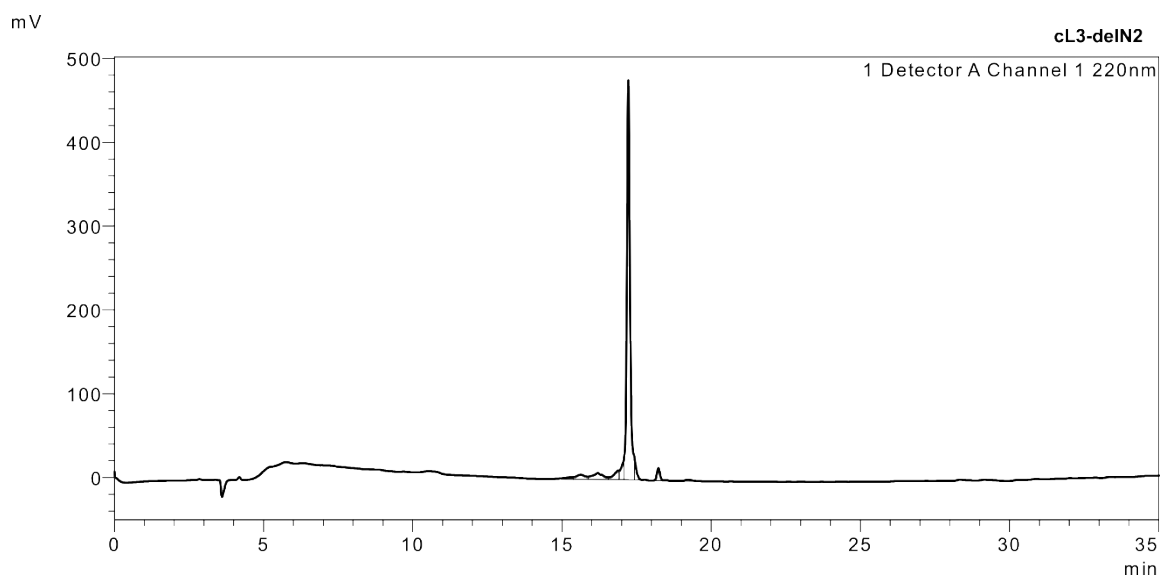

Figure S10

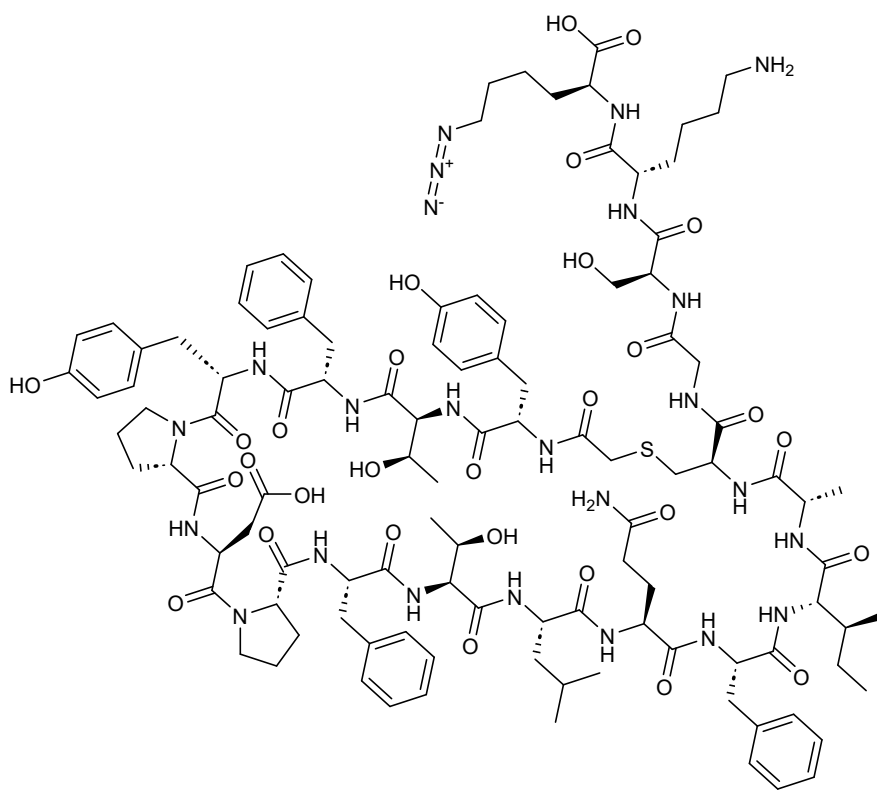

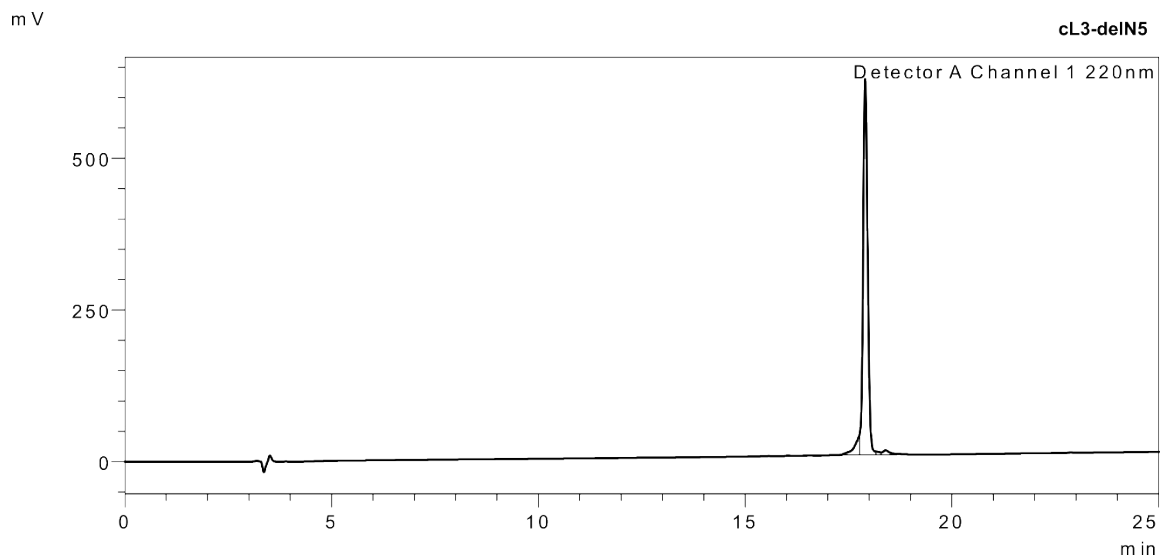

Figure S11

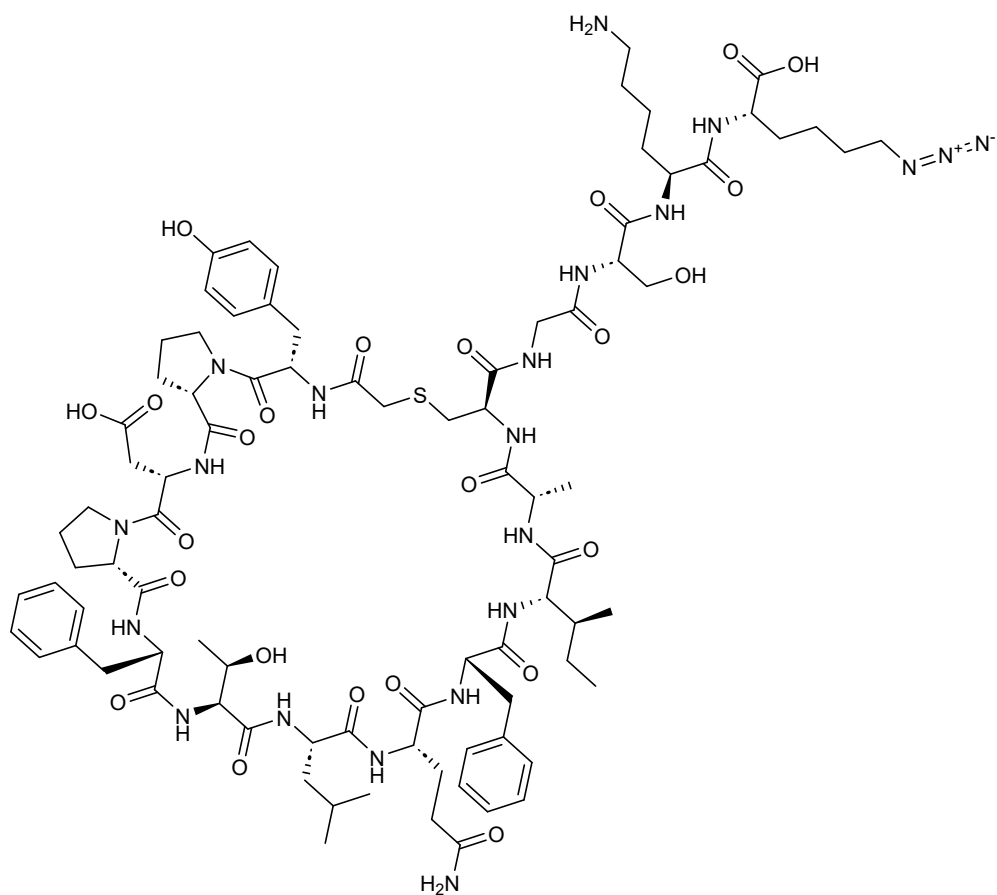

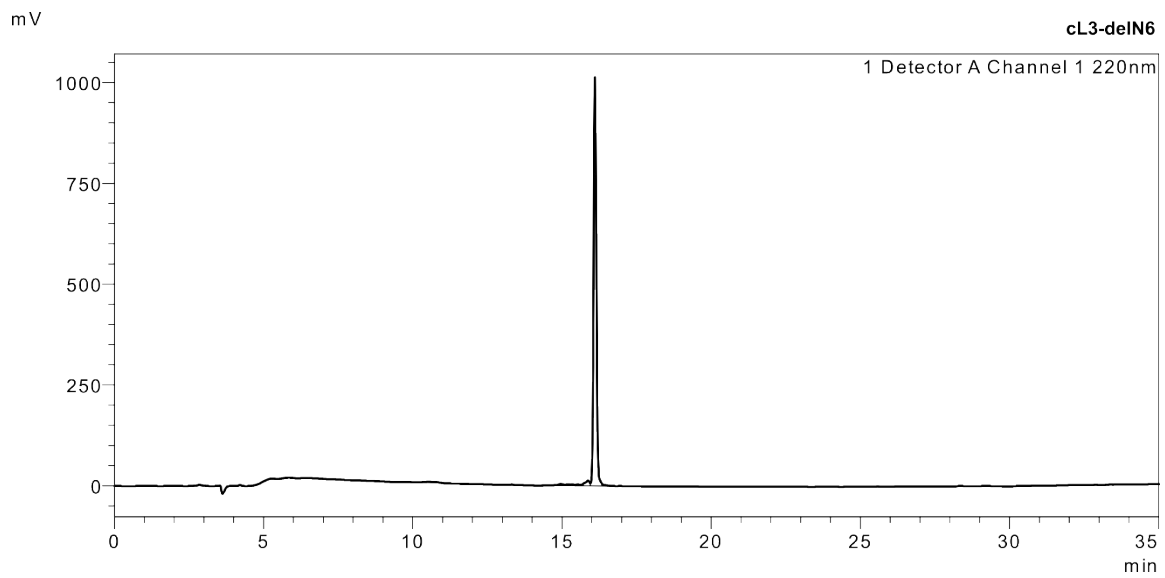

Figure S12

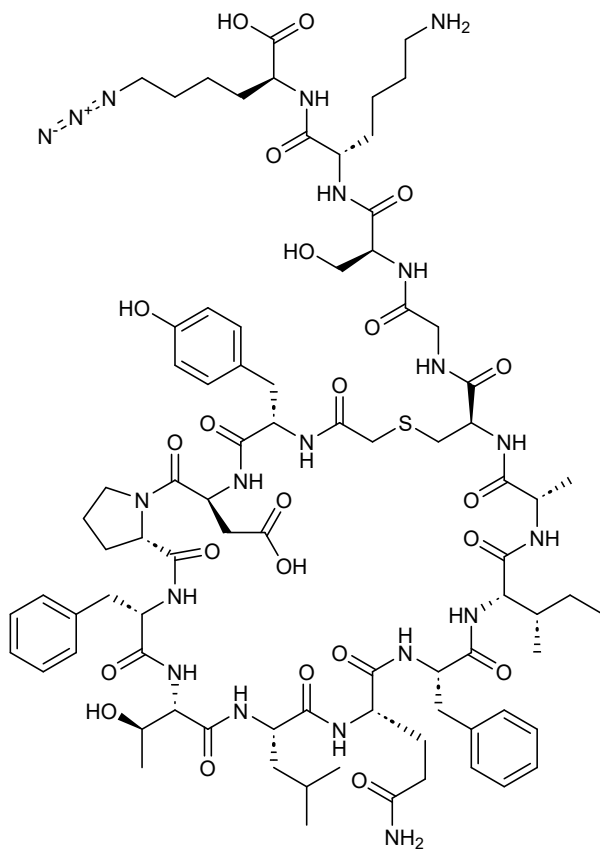

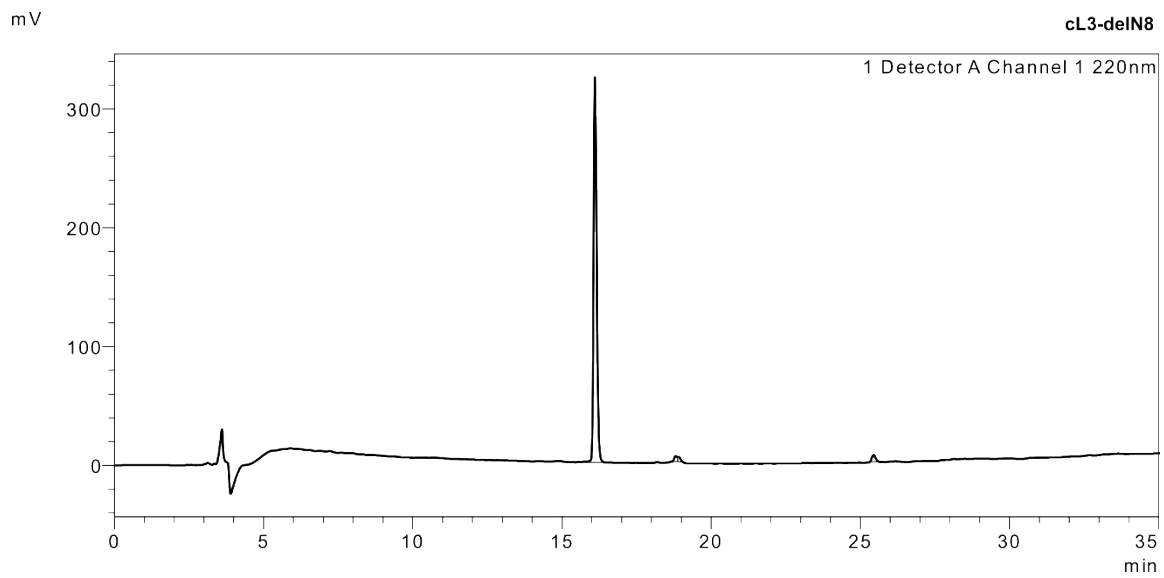

Figure S13

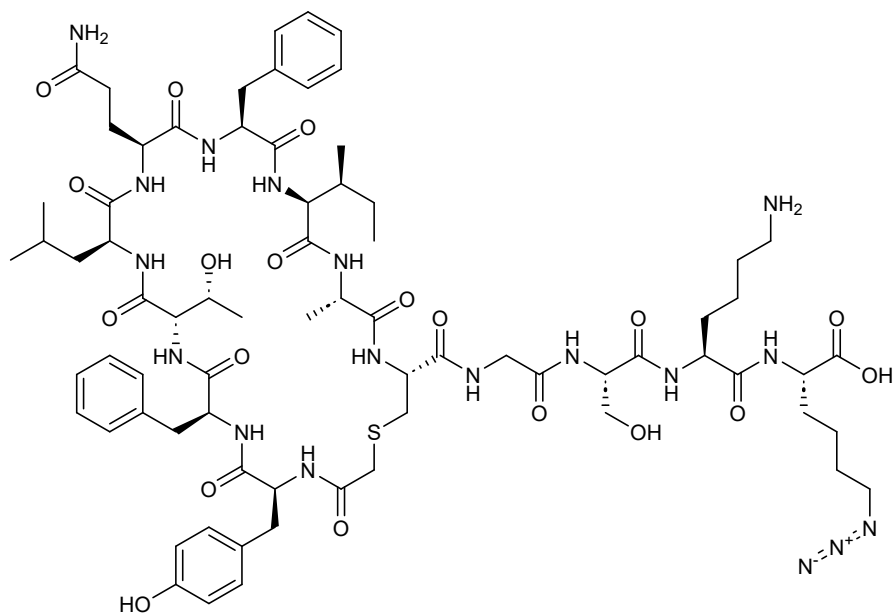

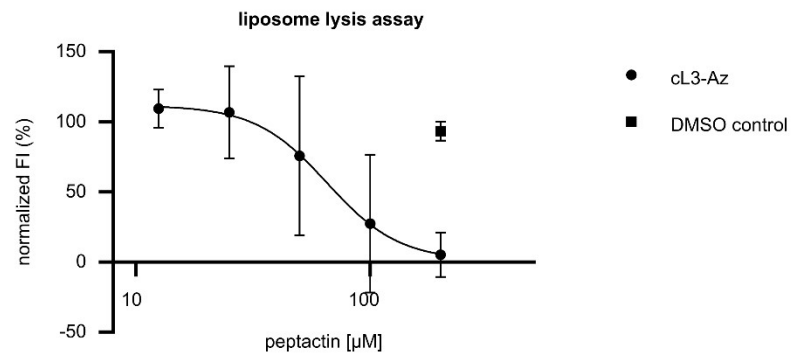

**Figure S14:** Normalized FI data of the inhibition experiment displayed in **fig 5b**. Datapoints are normalized to the average values of the conditions where no Ab was present (*min*) and only Ab was present (*max*). Data was normalized using  $(FI - \text{min}) / (\text{max} - \text{min}) * 100\%$ . The DMSO control is to check for activity in the absence of cL3-Az. Datapoints are displayed and the fitted model is the black line. Graphpad Prism version 9.3.1 was used for model fitting using a non-linear dose vs response curve with four parameters least squares fit. IC50: 65, CI confidence interval (%) IC50: ND,  $R^2$ : 0.62.



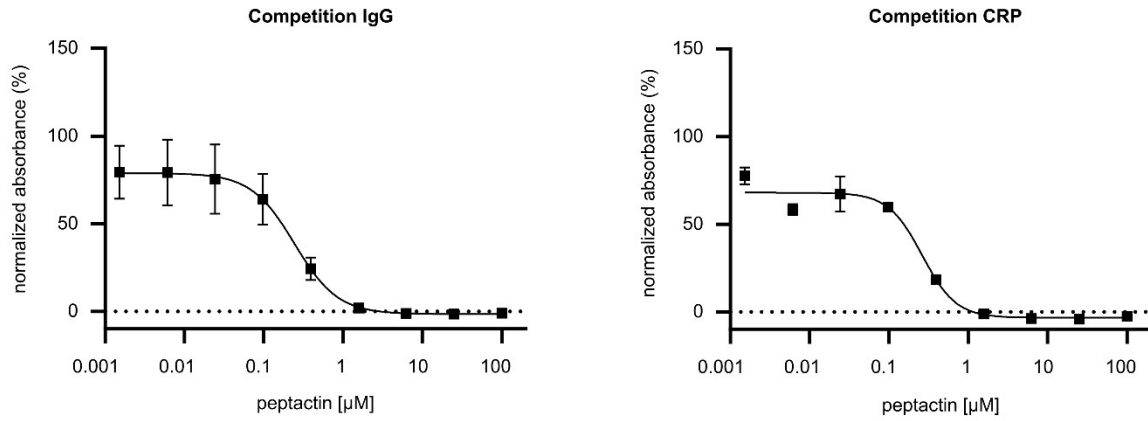

**Figure S15:** Normalized absorbance data of the ELISA described in **fig 5c** (competition IgG) and **fig 7b** (Competition CRP). The datapoints are displayed and the line is the fitted model (technical duplicates for both). Datapoints are displayed and the fitted model is the black line. Graphpad Prism version 9.3.1 was used for model fitting using a non-linear dose vs response curve with four parameters least squares fit. Competition with IgG: IC50: 0.24 , CI confidence interval (%) IC50: 0.14-0.39 , R<sup>2</sup>: 0.94. Competition with CRP: IC50: 0.26 , CI confidence interval (%) IC50: ND, R<sup>2</sup>: 0.97



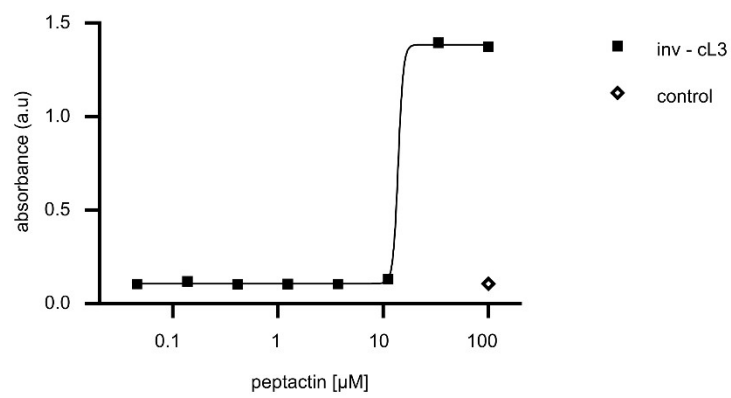

**Figure S17:** absorbance data as described in **fig 6a**. Datapoints are shown and was fitted (black line) using Graphpad Prism version 9.3.1 for model fitting using a non-linear dose vs response curve with four parameters least squares fit. EC50: 13.9, CI confidence interval (%) EC50: ND, R<sup>2</sup>: 0.99.

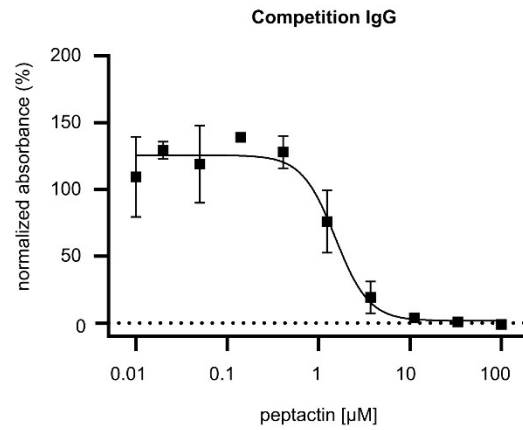

**Figure S18:** Normalized absorbance data as described in **fig 6b**. Datapoints are shown and was fitted (black line) using Prism version 9.3.1 for model fitting using a non-linear dose vs response curve with four parameters least squares fit. Competition with IgG: IC50: 1.5, CI confidence interval (%) IC50: 1.01-2.13,  $R^2$ : 0.94.

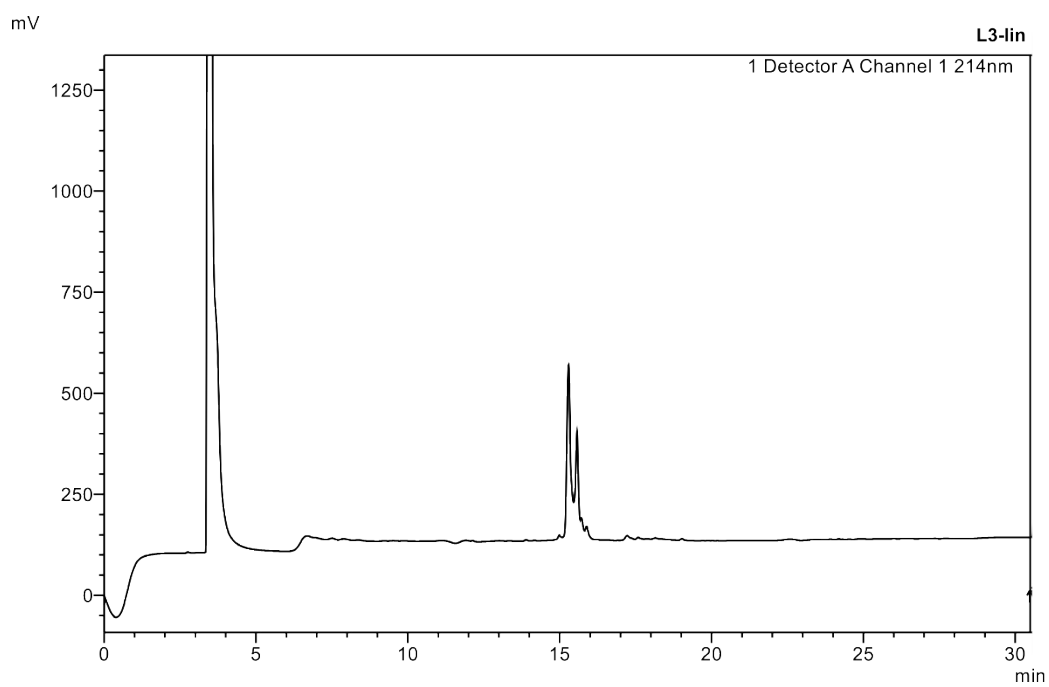

Figure S19

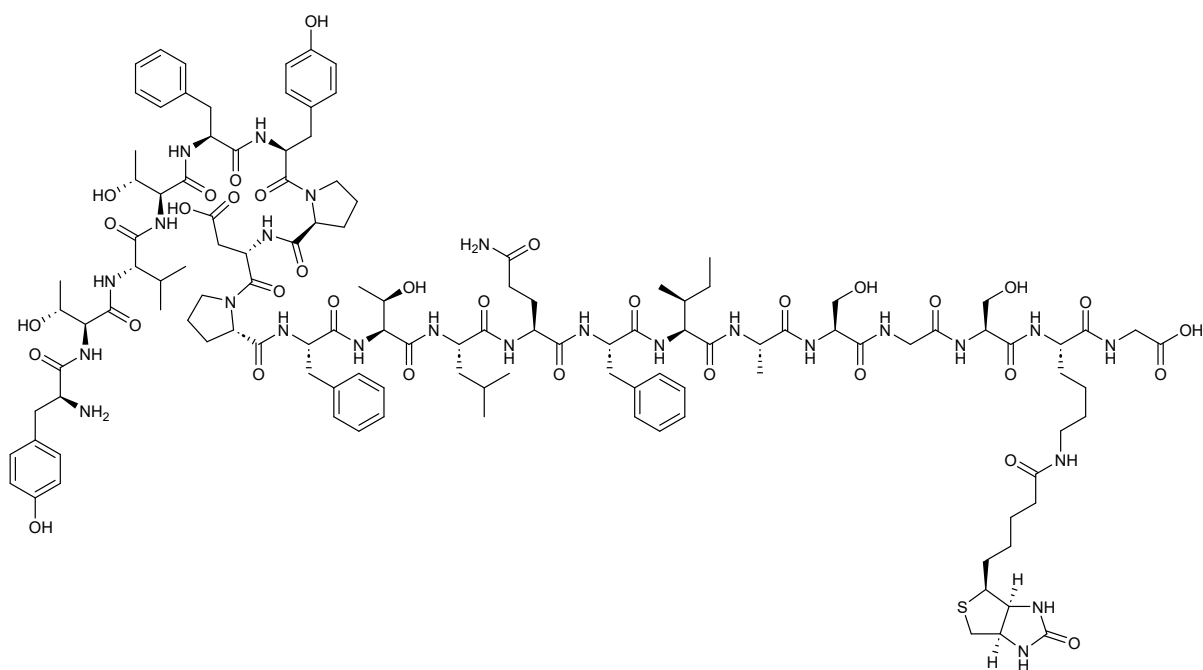

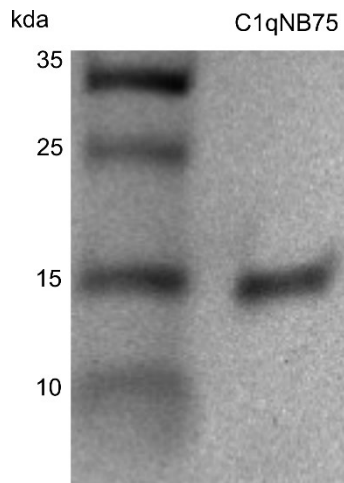

**Figure S20.** SDS-PAGE of C1qNB75 after purification. (PageRuler™ Plus Prestained Protein Ladder, 10 to 250 kDa (Thermo Scientific™) was used as a reference. See Table S1 for the amino acid sequence of the construct.

**Table S1:** amino acid sequences of the protein constructs.

|                | <i>Amino acid sequence</i>                                                                                                                                                                                                                                                                                                                                                                                                                                                                                         |
|----------------|--------------------------------------------------------------------------------------------------------------------------------------------------------------------------------------------------------------------------------------------------------------------------------------------------------------------------------------------------------------------------------------------------------------------------------------------------------------------------------------------------------------------|
| <i>SC-gC1q</i> | MARPLCTLLLLMATLAGALAGSDQPRPAFSAIRRNPPMGGNVVIFDVTITNQEEPYNHSG<br>RFVCTVPGYYYFTFQVLSQWEICLSIVSSSRGQVRRSLGFCDTTNKGLFQVVS GGMVLQLQ<br>QGDQVWVEKDKPKKGIYQGSEADSVFSGFLIFPSAGSGKQKFQSVFTVTRQTHQPPAPNSL<br>IRFNAVLTNPQGDYDTSTGKFTCKVPGLYFVYHASHATANLCVLLYRSGVKVVTFCGHTSK<br>TNQVNSGGVLLRLQVGEEVWLAVNDYDMVGIQGS DSVFSGFLLFPDGS AKATQKIAFSAT<br>RTINVPLRRDQTIREFDHVITNMNNNYEPRSGKFTCKVPGLYFETYHASSRGNLCVNLMRGR<br>ERAQKVVVTFCDYAYNTFQVTTGGMVLKLEQGENVFLQATDKNSL LGMEGANSIFSGFLLFP<br>DMEAAAWSHPQFEKGAAWSHPQFEKGAAWSHPQFEKGA* |
| <i>C1qNB75</i> | QVQLVETGGGLVQAGGSLRLSCAASGRTFNNDVMAWFRQAPGTEREFVALITAGGGTHYAD<br>SVKGRFVISRDNNDKNMAYLQMNSL KSEDTAIYYCGADENPPGWPSRWSSAYDYWGQGTQVT<br>VSSH HHHHH*                                                                                                                                                                                                                                                                                                                                                                    |

**Table S2:** amino acid sequences and modifications on the peptides. \* denotes the peptide is cyclized by means of chloroacetylation of the N-terminus. The lysine at the c-term position is either modified with an azide (Az) or a biotin (Bt). ' denotes the D-isomer of the tyrosine and is only used in the inv-cL3 peptide.

|                  | <i>Amino acid sequence</i>           |
|------------------|--------------------------------------|
| <i>cL3-Az</i>    | YTVTFY PDPFTLQFIAC*GS {lys (N3) }G   |
| <i>cL3-Bt</i>    | YTVTFY PDPFTLQFIAC*GS {lys (Bt) }G   |
| <i>inv-cL3</i>   | Y' TVTFY PDPFTLQFIAC*GS {lys (Bt) }G |
| <i>lin-L3</i>    | YTVTFY PDPFTLQFIASGS {Lys (Bt) }G    |
| <i>cL3-delN1</i> | Y-VTFY PDPFTLQFIAC*GSK {Lys (N3) }   |
| <i>cL3-delN2</i> | Y--TFY PDPFTLQFIAC*GSK {Lys (N3) }   |
| <i>cL3-delN5</i> | Y-----PDPFTLQFIAC*GSK {Lys (N3) }    |
| <i>cL3-delN6</i> | Y-----DPFTLQFIAC*GSK {Lys (N3) }     |
| <i>cL3-delN8</i> | Y-----FTLQFIAC*GSK {Lys (N3) }       |
| <i>cL3-delC1</i> | YTVTFY PDPFTLQFI-C*GSK {Lys (N3) }   |
| <i>cL3-delC2</i> | YTVTFY PDPFTLQF--C*GSK {Lys (N3) }   |
| <i>cL3-delC4</i> | YTVTFY PDPFTL----C*GSK {Lys (N3) }   |
| <i>cL3-delC6</i> | YTVTFY PDPF-----C*GSK {Lys (N3) }    |

**Table S3:** Theoretical mass and HRMS data of each peptide. Ppm diff is determined by taking the observed m/z displayed in the column: HRMS (m/z) subtracting the appropriate theoretical m/z value either plus 2 or 3 protons and dividing by the theoretical value to quantify the difference between observed and theoretical m/z values.

|                  | <i>theoretical MW</i> | $(M+2H)/2$ | $(M+3H)/3$ | <i>obsv Mass</i> | <i>ppm diff</i> |
|------------------|-----------------------|------------|------------|------------------|-----------------|
| <i>cL3-Az</i>    | 2420.1147             | 1211.0652  |            | 1211.0627        | 2.06E-06        |
| <i>cL3-Bt</i>    | 2620.2018             |            | 874.4084   | 874.4066         | 2.06E-06        |
| <i>inv-cL3</i>   | 2620.2018             |            | 874.4084   | 874.4560         | 5.44E-05        |
| <i>lin-L3</i>    | 2564.2297             | 1283.1227  |            | 1283.1191        | 2.81E-06        |
| <i>cL3-delN1</i> | 2391.3100             | 1196.0781  |            | 1196.0751        | 2.51E-06        |
| <i>cL3-delN2</i> | 2291.0721             | 1146.5440  |            | 1146.5400        | 3.49E-06        |
| <i>cL3-delN5</i> | 1879.8927             | 940.9542   |            | 940.9525         | 1.81E-06        |
| <i>cL3-delN6</i> | 1782.8399             | 892.4280   |            | 892.4262         | 2.02E-06        |
| <i>cL3-delN8</i> | 1570.7602             | 786.3874   |            | 786.3866         | 1.02E-06        |
| <i>cL3-delC1</i> | 2420.1511             | 1211.0834  |            | 1211.0796        | 3.14E-06        |
| <i>cL3-delC2</i> | 2307.0670             | 1154.5415  |            | 1154.5387        | 2.43E-06        |
| <i>cL3-delC4</i> | 2031.9400             | 1016.9780  |            | 1016.9754        | 2.56E-06        |
| <i>cL3-delC6</i> | 1817.8083             | 909.9121   |            | 909.9097         | 2.64E-06        |



**Table S4:** Sequences of the selected peptides from the RaPID screen. Data is provided in fasta format. Abbreviation gC1q-L-tyr-#1\_#2 : gC1q corresponds to SCgC1q used in the screen, L-tyr corresponds to the chloro-acetylated tyrosine (L-stereoisomer), #1 corresponds to the position in the list and #2 corresponds to the relative abundance percentage of each sequence within the sequencing data. See also data availability section of the manuscript for the full sequencing dataset or ref 59.

```
>gC1q-L-tyr-1_0.40126
YYFKYVPYPTGLYNVYCSGGSS*
>gC1q-L-tyr-2_0.18737
YYWAGCPSPLSDSGYRCSGGSS*
>gC1q-L-tyr-3_0.09057
YTVTFYPPFTLQFIACSGGGSS*
>gC1q-L-tyr-4_0.08282
YYWAGCSNLYINCGSRCSGGSS*
>gC1q-L-tyr-5_0.03826
YYWAGCPSPLSDSGYSCSGGGSS*
>gC1q-L-tyr-6_0.02821
YYWAGCHSPLSDSGYRCSGGSS*
>gC1q-L-tyr-7_0.0176
YYWAGCPSPLRDSGYRCSGGSS*
>gC1q-L-tyr-8_0.01275
YYTSKGPNPFCLLWRDCSGGGSS*
>gC1q-L-tyr-9_0.01045
YCFWISPLPKPEWFLDCSGGGSS*
>gC1q-L-tyr-10_0.00527
YYWAGCSNLYINCGSSCSGGSS*
>gC1q-L-tyr-11_0.00519
YFLNLKPSPFNWWNNYCSGGSS*
>gC1q-L-tyr-12_0.00513
YYWAGCSNLYINCSGGSS*
>gC1q-L-tyr-13_0.00342
YWLQSRPNPFQIEELWCSGGSS*
>gC1q-L-tyr-14_0.00339
YYWAGCHSPLSDSGYSCSGGGSS*
>gC1q-L-tyr-15_0.00336
YYFKYVPYPTGLYNVYCSGSGS*
>gC1q-L-tyr-16_0.00237
YMYKLAPYPGWLGHISCSGGSS*
>gC1q-L-tyr-17_0.00222
YYWAGCPSPLRDSGYSCSGGGSS*
>gC1q-L-tyr-18_0.00179
YYFKYVPYPTGLYNVYCRGGSS*
>gC1q-L-tyr-19_0.00172
YYWAGCPSPLSDSGYRCSGSGS*
>gC1q-L-tyr-20_0.00143
YCFKYVPYPTGLYNVYCSGGSS*
>gC1q-L-tyr-21_0.00116
```

YNVKWYPDPWLLTNP GCSGGSS\*  
>gC1q-L-tyr-22\_0.00114  
YYWAGCPSQLSDSGYRCSGGSS\*  
>gC1q-L-tyr-23\_0.00113  
YYFKYVPYPTGLYNVYCSGGSS\*  
>gC1q-L-tyr-24\_0.00113  
YYWAGCSNLYINCGSSDCSGGGSS\*  
>gC1q-L-tyr-25\_0.00109  
YICLFQKVAWFLDDACGSGSGS\*  
>gC1q-L-tyr-26\_0.00105  
YYFKYVPYPTGLYNVYCSGGGRS\*  
>gC1q-L-tyr-27\_0.00096  
YTVTFYPDPFTLQFIACSGSGS\*  
>gC1q-L-tyr-28\_0.00089  
YYWAGCPSPLSDSGYRCRGGSS\*  
>gC1q-L-tyr-29\_0.00089  
YPFCLHPIPLDLYIYLCSGGGSS\*  
>gC1q-L-tyr-30\_0.00085  
YYWAGCPSTLSDSGYRCSGGSS\*  
>gC1q-L-tyr-31\_0.00081  
YTVTFYPNPFTLQFIACSGGGSS\*  
>gC1q-L-tyr-32\_0.00081  
YYFKYVPYQTGLYNVYCSGGSS\*  
>gC1q-L-tyr-33\_0.00078  
YYFKYVPYPTGLYNVY\*SGGGSS\*  
>gC1q-L-tyr-34\_0.00078  
YWSHPQFEKENLYFQSMGCGSGSGS\*  
>gC1q-L-tyr-35\_0.00075  
YLCLNNKLSWTTVPSGCGSGSGS\*  
>gC1q-L-tyr-36\_0.00073  
YYFKYVPYPTGLYNVYCSGGGRS\*  
>gC1q-L-tyr-37\_0.00071  
YYWAGCPSPLSDRGYSCSGGGSS\*  
>gC1q-L-tyr-38\_0.00071  
YYWAGCHSPLRDSGYRCSGGSS\*  
>gC1q-L-tyr-39\_0.00069  
YYFKYVSYPTGLYNVYCSGGSS\*  
>gC1q-L-tyr-40\_0.00069  
YYWAGCSNLYINCGSRCSGSGS\*  
>gC1q-L-tyr-41\_0.00066  
YYWAGCPFPLSDSGYRCSGGSS\*  
>gC1q-L-tyr-42\_0.00058  
YYWAGCPSPLSDSGYRCSGGGRS\*  
>gC1q-L-tyr-43\_0.00058  
YYWAGCSNLYINCGSMCSGGSS\*  
>gC1q-L-tyr-44\_0.00058

YYWAGCPSPLSDSGYRCGGSS\*  
>gC1q-L-tyr-45\_0.00057  
YYFKYVPYPTGLYNVYCNGGGSS\*  
>gC1q-L-tyr-46\_0.00057  
YYWAGCPSPLSDSGYR\*SGGGSS\*  
>gC1q-L-tyr-47\_0.00056  
YYFKYVTYPTGLYNVYCSCGGSS\*  
>gC1q-L-tyr-48\_0.00055  
YYFKYVPYPTGLYNVYCSCGGSS\*  
>gC1q-L-tyr-49\_0.00054  
YYWAGCPSPLSDSGYGCSCGGSS\*  
>gC1q-L-tyr-50\_0.00054  
YWSHPQFEKENLYFQSMGCSGGSS\*  
>gC1q-L-tyr-51\_0.00053  
YYFKYVPYPTGLYNVYCSCGGSS\*  
>gC1q-L-tyr-52\_0.00053  
YYFKYVPYPTGLYNVYCSCGGSS\*  
>gC1q-L-tyr-53\_0.00053  
YYFKYVPYPTGLYNVY\*AAAAAA  
>gC1q-L-tyr-54\_0.0005  
YYFKYVPYPNGLYNVYCSCGGSS\*  
>gC1q-L-tyr-55\_0.00049  
YYFKYVPYPTGLYNIYCSCGGSS\*  
>gC1q-L-tyr-56\_0.00049  
YYFKYVPYTTGLYNVYCSCGGSS\*  
>gC1q-L-tyr-57\_0.00048  
YYWDGCPSPLSDSGYRCSCGGSS\*  
>gC1q-L-tyr-58\_0.00044  
YYFKYVPYPTGLYNVCCSCGGSS\*  
>gC1q-L-tyr-59\_0.00043  
YKWFSDPNPFILAHYTCSGGSS\*  
>gC1q-L-tyr-60\_0.00042  
YTCLSGRVSWSSWTPVCGSGSGS\*  
>gC1q-L-tyr-61\_0.00041  
YTVTFYDPDFTLQFIACRGGSS\*  
>gC1q-L-tyr-62\_0.00038  
YQVFSFSQAIEEYCVWLQRRRSS\*  
>gC1q-L-tyr-63\_0.00038  
YYFKYVPYPTGLYNVYCSCGGSS\*  
>gC1q-L-tyr-64\_0.00038  
YYWAGCLSPPLSDSGYRCSCGGSS\*  
>gC1q-L-tyr-65\_0.00037  
YYWAGCTSPPLSDSGYRCSCGGSS\*  
>gC1q-L-tyr-66\_0.00036  
YYWAGCSNLYINCGSRCRGGSS\*  
>gC1q-L-tyr-67\_0.00036

YICLAGRTAWARSESDCGSGSGS\*  
>gC1q-L-tyr-68\_0.00036  
YYWAGCPSPLSDSWYRCSGGGSS\*  
>gC1q-L-tyr-69\_0.00036  
YYFKYVPYPTGLYNVYCSGGGNS\*  
>gC1q-L-tyr-70\_0.00036  
YYWAGCPSPLSDSGYRCSGGGSR\*  
>gC1q-L-tyr-71\_0.00033  
YYWAGCSSPLSDSGYRCSGGGSS\*  
>gC1q-L-tyr-72\_0.00033  
YYWAGCSNLYINCGSRCSGGSS\*  
>gC1q-L-tyr-73\_0.00033  
YYWAGCASPLSDSGYRCSGGGSS\*  
>gC1q-L-tyr-74\_0.00031  
YYWAGCSNLYINCGYRCSGGGSS\*  
>gC1q-L-tyr-75\_0.00031  
YYFKYVPYPTGLYNVYCSGGDSS\*  
>gC1q-L-tyr-76\_0.00029  
YTVTFYPPDPFTLQFIA\*SGGGSS\*  
>gC1q-L-tyr-77\_0.00029  
YYWAGCPSPMSDSGYRCSGGGSS\*  
>gC1q-L-tyr-78\_0.00029  
YYWAGCSNLYINCGSRCSGGGRS\*  
>gC1q-L-tyr-79\_0.00028  
YYFKYVPYPTGLYNVYCSGGGNS\*  
>gC1q-L-tyr-80\_0.00028  
YYWAGCSNLYIYCGSRCSGGGSS\*  
>gC1q-L-tyr-81\_0.00028  
YTVTFYPPDPFTLQFIECSGGGSS\*  
>gC1q-L-tyr-82\_0.00028  
YYFKYVPYPTGLYSVYCSGGGSS\*  
>gC1q-L-tyr-83\_0.00027  
YTVTFYPPDPFTLQFIACSGGSS\*  
>gC1q-L-tyr-84\_0.00027  
YYFKYVPYPTGLYNVYYSGGGSS\*  
>gC1q-L-tyr-85\_0.00027  
YYFKYVPYPTGLYNV\*CSGGGSS\*  
>gC1q-L-tyr-86\_0.00026  
YYWAGCPSPLSDSGYR\*AAAAAA  
>gC1q-L-tyr-87\_0.00026  
YYWAGCSNLYINCGSR\*SGGGSS\*  
>gC1q-L-tyr-88\_0.00025  
YY\*AGCPSPLSDSGYRCSGGGSS\*  
>gC1q-L-tyr-89\_0.00025  
YFYTWVPPNPFVLGNLYCSGGGSS\*  
>gC1q-L-tyr-90\_0.00024

YYWAGCPSPLSDSGYRCSGSGSS\*  
>gC1q-L-tyr-91\_0.00023  
YYWAGCSNLYINCGSRCSGGGSR\*  
>gC1q-L-tyr-92\_0.00023  
YYFKYVPYPTGLYNVYCSGGGTS\*  
>gC1q-L-tyr-93\_0.00023  
YTVTFYPDPFTLQFITCSGGGSS\*  
>gC1q-L-tyr-94\_0.00023  
YTVTFYPDPFTLQFIACSGGGRS\*  
>gC1q-L-tyr-95\_0.00023  
YYWAGCPYPLSDSGYRCSGGGSS\*  
>gC1q-L-tyr-96\_0.00022  
YYFKYVPYPTGLYNVYCGGGGSS\*  
>gC1q-L-tyr-97\_0.00022  
YYWAGCPSQLSDSGYSCSGGGSS\*  
>gC1q-L-tyr-98\_0.00022  
YYWAGCPSPLSDRGYRCSGGGSS\*  
>gC1q-L-tyr-99\_0.00021  
YYFKYVPYPTGLYNVYCSGGGSS\*  
>gC1q-L-tyr-100\_0.00021  
YKVTTFYPDPFTLQFIACSGGGSS\*
